# Supplementary material
Source: publisher site journal article supplement (https://www.dovepress.com/article/308151)
Supplement: Supplementary file 1 [file get_supplementary_file.php]

**Supplemental material A: Sample characteristics**

Our research sample, compared to all registered users in hospital statistics during the recruitment period, where available.

*Table A1.*

*Main diagnoses at baseline*

| Main diagnosis reported by clinicians, grouped by researchers | Research sample | | All registered* | |
| --- | --- | --- | --- | --- |
| *n* | Valid % | *n* | Valid % |
| Psychosis F20-F29 | 7 | 15,2 | 9 | 16,07  16,07 |
| Bipolar disorder F30-F31 | 7 | 15,2 | 9 | 16,07 |
| Personality disorders F60-61 | 7 | 15,2 | 10 | 17,86 |
| Affective disorder, non-bipolar F32-F39 | 6 | 13,0 | 7 | 12,50 |
| Anxiety F40-41 | 6 | 13,0 | 5** | 8,93 |
| Trauma/stress F43 | 5 | 10,9 | 6 | 10,71 |
| Hyperkinetic disorder F90 | 4 | 8,7 | 4 | 7,14 |
| Dissosiation F44+ F48.1 | 1 | 2,2 | 2 | 3,57 |
| Somatoform disorders F45 | 1 | 2,2 | 1 | 1,79 |
| Eating disorders F50 | 1 | 2,2 | 1 | 1,79 |
| Pervasive developmental disorders F84 | 1 | 2,2 | 0** | 0 |
| N valid | 46 |  | 56 |  |
| Missing | 0 |  |  |  |

**Hospital statistics from the study period among planned and ordinary stays excluded readmittances within 30 days.*

**Our research sample and hospital statistics are drawn from different sources (questionnaires versus electronic journal). There may be errors or differences in registration, explaining instances in our research sample seemingly not included in overall statistics.

*Table A2.*

*Psychotropic medications prescribed at baseline*

| **Medication groups*** | ***n***  **Medications in use** | **%**  **of medications in use** |
| --- | --- | --- |
| NLH 5.3 Antidepressants | 25 | 31.25 |
| NLH 5.2 Antipsychotics | 22 | 27.50 |
| NLH 5.1 Anxiolytics and hypnotics | 18 | 22.50 |
| NLH 6.1 Antiepileptics | 7 | 8.75 |
| NHL 9.1 Histamine H1-antagonists | 6 | 7.50 |
| NLH 5.5 Mood stabilizers | 2 | 2.50 |
| Total | 80 |  |
| **Excludes medications grouped as “other” or “don’t know” by clinicians (included somatic medications)* | | |

*Table A3.*

*Age*

|  | Research sample | All registered* |
| --- | --- | --- |
| Mean | 37,85 | 37,46 |
| Median | 34,00 |  |
| SD | 12,94 |  |
| Minimum | 62 |  |
| Maximum | 19 |  |
| N Valid | 46 | 56 |
| Missing | 0 |  |

**Hospital statistics from the study period among planned and ordinary stays excluded readmittances within 30 days.*

*Table A4.*

*Gender*

|  | Research sample | | All registered * | |
| --- | --- | --- | --- | --- |
|  | *n* | Valid % | *n* | Valid % |
| Male | 14 | 30,43 | 20 | 35,71 |
| Female | 32 | 69,57 | 36 | 64,29 |
| N valid | 46 | 100,00 | 56 |  |
| Missing | 0 |  |  |  |

**Hospital statistics from the study period among planned, ordinary stays excluded readmittances within 30 days.*

**Supplemental material B: Questions from self report questionnaire used in this study**

**Translated from norwegian**

**General introduction to the entire questionnaire**

**Questionnaire at beginning of treatment about you and your treatment in the last 6 months**

The questions are about background information, what is important for you, and treatment received in the last 6 months (before your current admission). Please check the best answer for each question. **Only one answer per question, unless otherwise specified.**

Regarding questions about your therapist or service provider, think of those involved in treatment of your mental health in the period.

This form is used only in research, and your therapist will not see your answers.

**Questions used in this Study**

***Being respected for the wish not to use medication***

| Have you received help with psychotropics the last 6 months?  *Please check one box for the most suitable answer.* | | Strongly disagree | Disagree | Neutral | Agree | Strongly agree | Not applicable |
| --- | --- | --- | --- | --- | --- | --- | --- |
| | 7 | | --- | | I have been respected for my wish not to use medication. | oo | oo | oo | oo | oo | oo |

***Reasons for wanting MFT***

**Your agenda**

1. Were you referred for medication-free treatment?*

□ 1 Yes □ 2 No □ 3 Don’t know

**Medication-free inpatient units is a government measure initiated by user organizations. The goal is to ensure that patients get real alternatives to medication for mental disorders (psychotropics), as well as to gather experience with alternatives to medication. Therefore, the unit’s main focus is on psychosocial treatment. Patients who are referred to this unit will not be subjected to persuasion or pressure regarding medication and will get help finding other coping strategies. One can choose not to use psychotropics even though it is recommended in current guidelines as long as the treatment in total is clinically justifiable. One can also use psychotropic medication if desired.*

**If Yes:**

2. Who wanted medication-free treatment? (Multiple choices possible)

□ 1 Self □ 2 Next of kin □ 3 Health professional □ 4 Others

**If Self:**

3. Why was this important to you? (Multiple choices possible)

□ 1 I have felt pressure to use medication

□ 2 I experience lack of alternatives to medication

□ 3 Use of medication does not fit my understanding of my problems

□ 4 I have had negative experiences with effects and/or side effects of medication

□ 5 Other

Describe:

***Sample characteristics***

Birth year: _______

Gender

1 Male  2 Female  3 Other

Are you under an outpatient commitment order?

1 Yes  2 No

Use of medication for mental illness

I use no medications

I use medications

**General ending to the entire questionnaire**

Please check that you have answered all questions.

Thank you for giving us important information!

**Supplemental material C: Questions from clinician questionnaire used in this study**

**Translated from norwegian**

**General introduction to the entire questionnaire**

Questionnaire for clinician at treatment start

The questionnaire is filled out on the basis of all information one has about and obtains from the patient. Please fill in the top text on each page so each page is adequately marked in case of separation.

**Questions used in this article**

***Sample characteristics***

**Use of medication for mental illness (indication)**

The patient uses no medication

The patient uses medication (fill in below about all current prescribed medications)

Depot medicine for injection: ______________________ Dose: ______ mg Interval: _____ days

Whether use of depot is voluntary: Voluntary  Involuntary

Current prescribed medications (at admission):

**Current diagnoses:**

Main diagnosis (ICD-10):

**End of the entire questionnaire**

Please check that you have answered all questions.

Thank you for giving us important information!

**Supplemental material D: Interview guide**

**Translated from norwegian**

**Part one: Reasons for medication-free treatment**

1. This ward is called a “medication-free inpatient ward”. What does this term mean to you?

2. When did you first hear about this phenomenon?

3. Before you came, how did you picture you would notice the difference between a medication-free ward and an ordinary ward?

4. How did you first hear about this ward?

5 What was important to you when being referred for this admission?

Was it important for you to come to a medication-free ward?

| If yes | If no |
| --- | --- |
| 6. Why was this important to you?  7. Do you have any experiences contributing to this being important for you? Would you like to share some of these?  8. How long have you wanted such a service? | 6. What do you think about the ward being medication-free?  7. If you could choose freely between medication-free and and ordinary ward, all else being equal (treatment offer, duration, waiting time, persons, own reasons etc.) what would you have chosen?  a. Why? |

**Part two: Experience of medication-free treatment**

9. All in all, what do you think about your stay here on the MFT-ward?

- What have you been most satisfied with during the stay?

- What have you been least satisfied with during the stay?

- If you had met another man or woman who was in need of mental health care, would you recommend this ward?

10. If you have been admitted to another inpatient ward earlier (including this ward before it became an MFT-ward), what would you say is the biggest difference between those wards and this one?

11. If you during your stay have chosen to not use medication or reduce medication, what has this been like?

- Do you think you have gotten help in working with your problems in other ways (than taking medications)?

- Have you gotten alternatives/help you have not gotten elsewhere?

- Do you feel supported in tackling your challenges without medication?

12. During your stay, do you feel you have had influence on your treatment? (decide, affect, participate, be heard)

- Do you feel you have had enough influence, or would you have preferred more?

*- If much influence:* Do you think this opportunity to decide would be as good on a ward that was not medication-free?

14. If you should give an advice to us working here for the treatment to be better, what would it be?

15. If you could choose exactly the treatment you wanted, what would you choose?

If time left:

1. Do you feel your thoughts about choices and needs regarding treatment is taken into consideration by therapists (Therapists in general, not just the pones you have met)

2. What kind of experiences do you have from conversations about treatment choices? Some say they do not dare to tell all about how they feel, because they are afraid they will not get to choose the treatment they want, but may be forced to take medicines, or even involuntary admitted. Do you have such thoughts?
